# Supplementary material
Source: Elsevier journal article supplement (https://www.sciencedirect.com/science/article/pii/S1413355518304593)
Supplement: mmc1 [file S1413355518304593:mmc1.doc]

**Supporting File**

In this material relevant information about the systematic review process26,27 is reported. “Effect of combined interval training on the cardiorespiratory fitness in heart failure patients: A systematic review and meta-analysis”.

The present study was conducted based on the *Preferred Reporting Items for Systematic Review and Meta-analyses: The PRISMA Statement*25 recommendations, between September 2017 and October 2018. **Table S1** presents the accomplishment of the PRISMA checklist. The search was conducted in four electronic databases according to the worldwide scientific relevance: MEDLINE (*Medical Literature Analysis and Retrieval System online)* via PubMed, ScienceDirect, Sportdiscus, BIREME (*Latin American and Caribbean Center on Health Sciences Information*) and Scielo.

A total of 411 studies were found combining the descriptors, in which 23 were duplicated. Therefore, 368 studies did not meet the selection criteria, resulting in 20 eligible studies that could be viewed as full text. After an eligibility assessment, 10 studies were excluded, resulting in 10 studies included in the synthesis. All studies included in the eligible evaluation that were not included in the qualitative synthesis are listed in **Table S2**.

The quality of the evidence for each outcome was analyzed according to the Grading of Recommendations, Assessment, Development and Evaluation (GRADE)28 and is shown in **Figure S1**.


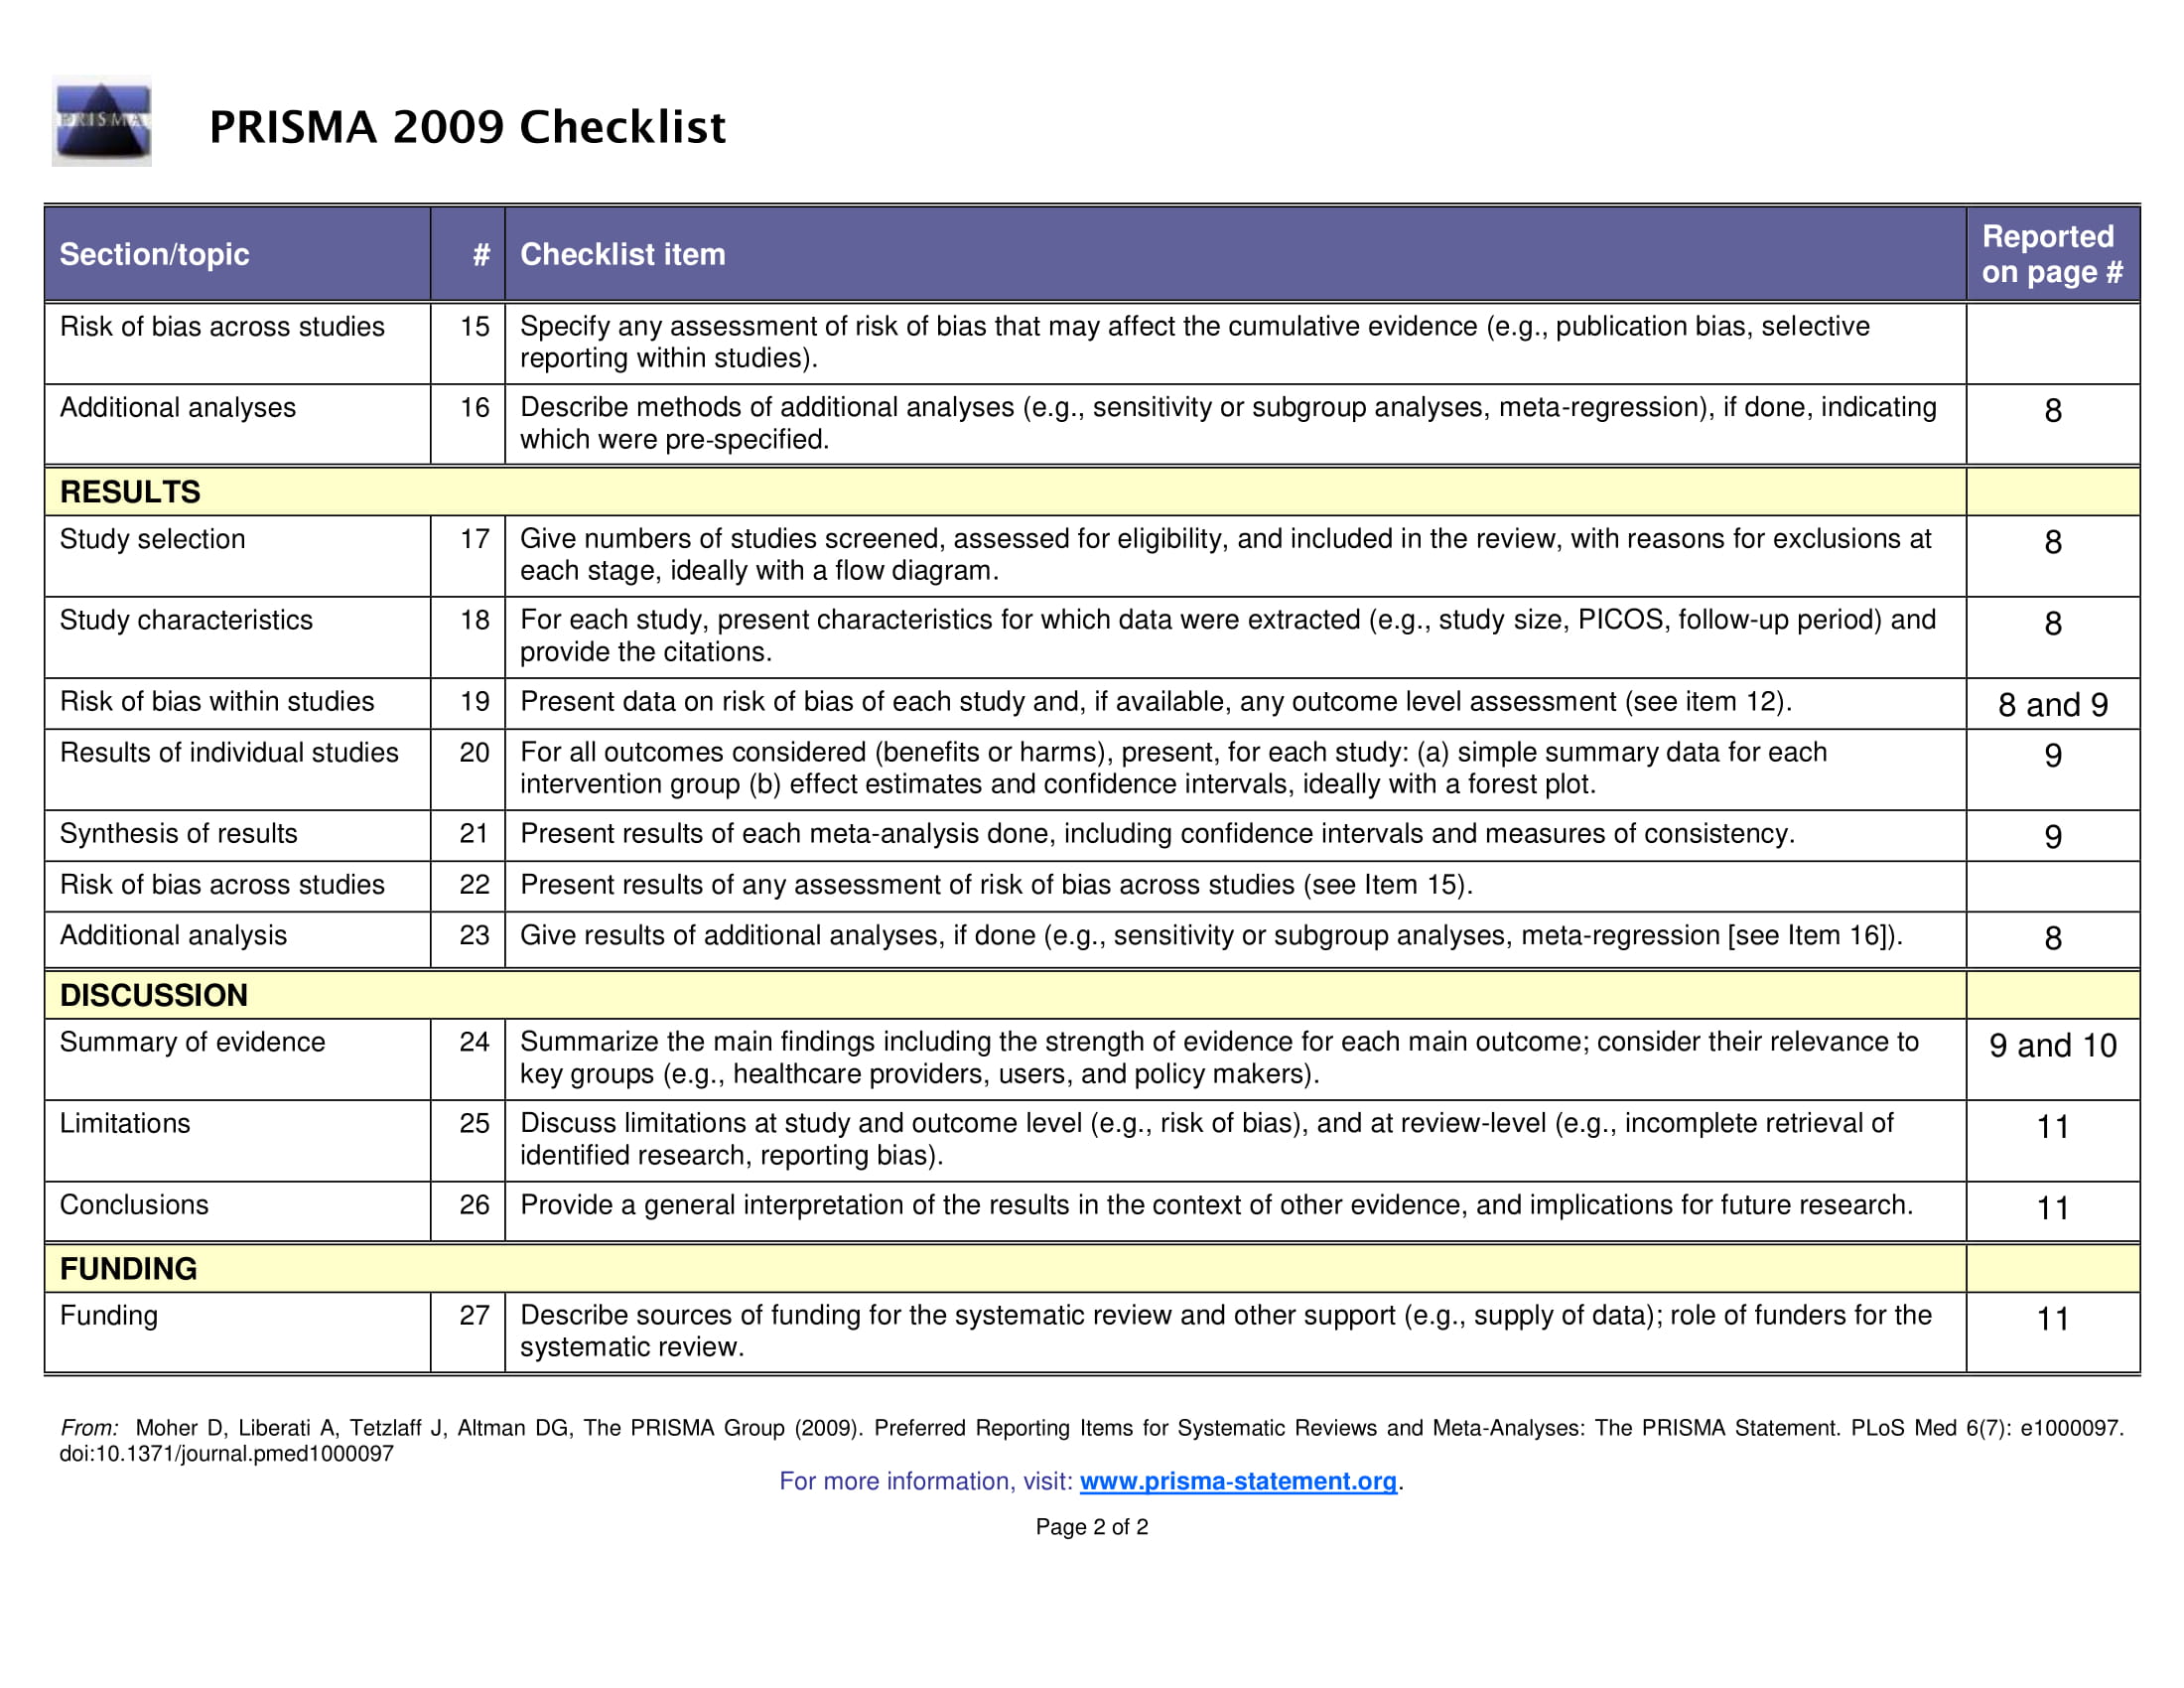
**Table S1**. Checklist items to be included without systematic review or meta-analysis report

**Table S2 -** Studies identified as eligible not included for qualitative synthesis.

|  | **References** |
| --- | --- |
| 1. Evaluated the effect of supplementation | 1. Cornelissen V, Defoor J, Stevens A, Schepers D, Hespel P, Decramer M, et al. Effect of creatine supplementation as a potential adjuvant therapy to exercise training in cardiac patients: a randomized controlled trial. Clin Rehabil. 2010 Nov 24;24(11):988–99. DOI: 10.1177/0269215510367995 |
| 2.Did not evaluate VO2peak | 1. Gremeaux V, Drigny J, Nigam A, Juneau M, Guilbeault V, Latour E, et al. Long-term Lifestyle Intervention with Optimized High-Intensity Interval Training Improves Body Composition, Cardiometabolic Risk, and Exercise Parameters in Patients with Abdominal Obesity. Am J Phys Med Rehabil. 2012 Nov;91(11):941–50. DOI: 10.1097/PHM.0b013e3182643ce0 2. Conraads VMA, De Maeyer C, Beckers P, Possemiers N, Martin M, Van Hoof V, et al. Exercise-induced biphasic increase in circulating NT-proBNP levels in patients with chronic heart failure. Eur J Heart Fail. 2008 Aug;10(8):793–5. DOI: 10.1016/j.ejheart.2008.06.008 3. Adsett J, Morris N, Kuys S, Hwang R, Mullins R, Khatun M, et al. Aquatic Exercise Training is Effective in Maintaining Exercise Performance in Trained Heart Failure Patients: A Randomised Crossover Pilot Trial. Hear Lung Circ. 2017 Jun;26(6):572–9. DOI: 10.1016/j.hlc.2016.10.017 4. Praet SFE, Jonkers RAM, Schep G, Stehouwer CDA, Kuipers H, Keizer HA, et al. Long-standing, insulin-treated type 2 diabetes patients with complications respond well to short-term resistance and interval exercise training. Eur J Endocrinol. 2008 Feb 1;158(2):163–72. DOI: 10.1530/EJE-07-0169 |
| 3. Samples without diagnosis of Heart Failure | 1. Delvecchio L, Reaburn P, Trapp G, Korhonen MT. Effect of concurrent resistance and sprint training on body composition and cardiometabolic health indicators in masters cyclists. J Exerc Rehabil. 2016 Oct 31;12(5):442–50. DOI: 10.12965/jer.1632672.336 2. Schulz SVW, Laszlo R, Otto S, Prokopchuk D, Schumann U, Ebner F, et al. Feasibility and effects of a combined adjuvant high-intensity interval/strength training in breast cancer patients: a single-center pilot study. Disabil Rehabil. 2017 Mar 21;1–8. DOI: 10.1080/09638288.2017.1300688 3. Currie KD, Bailey KJ, Jung ME, McKelvie RS, MacDonald MJ. Effects of resistance training combined with moderate-intensity endurance or low-volume high-intensity interval exercise on cardiovascular risk factors in patients with coronary artery disease. J Sci Med Sport. 2015 Nov;18(6):637–42. DOI: 10.1016/j.jsams.2014.09.013 4. Bruseghini P, Calabria E, Tam E, Milanese C, Oliboni E, Pezzato A, et al. Effects of eight weeks of aerobic interval training and of isoinertial resistance training on risk factors of cardiometabolic diseases and exercise capacity in healthy elderly subjects. Oncotarget. 2015 Jul 10;6(19):16998–7015. DOI: 10.18632/oncotarget.4031 5. Verney J, Kadi F, Saafi MA, Piehl-Aulin K, Denis C. Combined lower body endurance and upper body resistance training improves performance and health parameters in healthy active elderly. Eur J Appl Physiol. 2006;97(3):288–97. DOI: 10.1007/s00421-006-0175-z |

| **Certainty assessment** | | | | | | | | | **Nº. of patients** | | **Effect** | | **Certainty** | | **Importance** | | |
| --- | --- | --- | --- | --- | --- | --- | --- | --- | --- | --- | --- | --- | --- | --- | --- | --- | --- |
| **Nº. of studies** | **Study design** | | **Risk of bias** | | **Inconsistency** | **Indirectness** | **Imprecision** | **Other considerations** | **CT** | **IT** | **Relative (95% CI)** | **Absolute (95% CI)** |  | |  | | |
| **A**. VO2peak CT vs IT (follow up: 12 weeks) | | | | | | | | | | | | | | | | | |
| 6 | randomised trials | | serious **a** | | not serious | not serious | not serious | none | 82 | 88 | - | SMD **0.25 higher** (0.05 higher to 0.45 higher) | ⨁⨁⨁◯ MODERATE | | | CRITICAL | |
| **B**. VO2peak CT vs WI (follow up: range 12 weeks to 26 weeks) | | | | | | | | | | | | | | | | | |
| 5 | | randomised trials | serious a | not serious | | not serious | not serious | none | 140 | 137 | - | SMD **0.47 higher** (0.32 higher to 0.63 higher) | | ⨁⨁⨁◯ MODERATE | | | CRITICAL |

**Figure S1.** Quality of evidence (GRADE) between CT versus IT (A), and CT versus without intervention (B) for VO2peak. **CI:** Confidence interval; **SMD:** Standardised mean difference; **CT** = combined training; **IT** = interval training; **WI** = without intervention; **a**. Allocation concealment, blinding of participants and/or personnel and blinding of outcome assessment likely.

**References**

1. Moher D, Liberati A, Tetzlaff J, Altman DG. Preferred Reporting Items for Systematic Reviews and Meta-Analyses: The PRISMA Statement. PLoS Medicine. 2009;6(7):e1000097, <https://doi.org/10.1371/journal.pmed.1000097>
2. Higgins JPT, Green S. Cochrane Handbook for Systematic Review of Interventions Version 5.1.0 [updated June 2018] [Internet]. The Cochrane Collaboration; 2011. Available from: <http://handbook.cochrane.org/>
3. Mancini MC, Cardoso JR, Sampaio RF, Costa LCM, Cabral CMN, Costa LOP. Tutorial for writing systematic reviews for the Brazilian Journal of Physical Therapy (BJPT). Braz J Phys Ther. 2014 Nov-Dec; 18(6):471-480, <http://dx.doi.org/10.1590/bjpt-rbf.2014.0077>.
4. Balshem H, Helfand M, Schünemann HJ, et al. GRADE guidelines: 3 Rating the quality of evidence. J ClinEpidemiol. 2011;64(4):401–406, <http://dx.doi.org/10.1016/j.jclinepi. 2010.07.015>.
